# Supplementary material for: Novel Octapeptide Containing the RGD Sequence as a Potential Anti-SARS-CoV-2 Agent: Design, Synthesis, and Theoretical Studies
Source: Research Square preprint supplement (doi:10.21203/rs.3.rs-6992359/v1), 2025-07-07
Supplement: Supplementary file 1 [file 73971d75b3161f3595f91255.docx]

Supporting Information

Novel Octapeptide Containing the RGD Sequence as a Potential Anti-SARS-CoV-2 Agent: Design, Synthesis, and Theoretical Studies

Reiner Lemos,[1]* Orlando Ortiz,[1] Luis Almagro,[1] Kamil Makowski,[2] Hortensia Rodríguez,[3] Fernando Albericio,[4]* Margarita Suarez[1]*

[1] Laboratorio de Síntesis Orgánica, Facultad de Química, Universidad de la Habana, 10400-La Habana, Cuba.

[2] Department of Surfactants and Nanobiotechnology, Institute for Advanced Chemistry of Catalonia. (IQAC-CSIC), 08034 Barcelona (Spain) and Centro de Investigación Biomédica en Red Bioingeniería Biomateriales y Nanomedicina (CIBER-BBN) 28029-Madrid (Spain)

[3] Yachay Tech Medicinal Chemistry Research Group (MedChem-YT), School of Chemical Sciences and Engineering, Yachay Tech University, 100119-Urququi, Ecuador.

[4]School of Chemistry and Physics, University of KwaZulu-Natal, Durban 4001, South Africa and Department of Organic Chemistry, University of Barcelona, Barcelona, Spain.

Corresponding authors: [reinier.lemos@fq.uh.cu](mailto:reinier.lemos@fq.uh.cu) (RL), [albericio@ub.edu](mailto:albericio@ub.edu); [albericio@ukzn.ac.za](mailto:albericio@ukzn.ac.za) (FA), [msuarez@fq.uh.cu](mailto:msuarez@fq.uh.cu) (MS)

[**1.** **Spectroscopy characterization** S1](#_Toc201834149)

[1.1. Spectra of peptide **1** (Mal-LARGDVGA) S1](#_Toc201834150)

[**Figure S1.** 1H NMR spectrum of peptide Mal-LARGDVGA. S1](#_Toc201834151)

[**Figure S2.** 13C NMR spectrum of peptide **1**. S2](#_Toc201834152)

[**Figure S4.** HSQC spectrum of peptide **1** S3](#_Toc201834153)

[**Figure S5.** HMBC spectrum of peptide **1** S3](#_Toc201834154)

[**Figure S6.** COSY spectrum of peptide **1**. S4](#_Toc201834155)

[**Figure S7.** 15N-1H correlation HMBC spectrum of peptide **1** S4](#_Toc201834156)

[**Figure S8.** FTIR spectrum of peptide **1**. S5](#_Toc201834157)

[**2.** **HPLC chromatogram** S6](#_Toc201834158)

[**Figure S9**. RP-HPLC spectrum of peptide **1** S6](#_Toc201834159)

[**3.** **Mass spectrometry** S7](#_Toc201834160)

[**Figure S10.** ESI-MS of peptide **1** S7](#_Toc201834161)

[**4.** **Thermogravimetric analysis** S7](#_Toc201834162)

[**Figure S11**. Thermogravimetric analysis of peptide **1** S7](#_Toc201834163)

[**5.** **Theoretical calculations** S8](#_Toc201834164)

[Table S1. Cartesian atom coordinates of peptide **1** S8](#_Toc201834165)

# **Spectroscopy characterization**

## Spectra of peptide **1** (Mal-LARGDVGA)

## **Figure S1.** 1H NMR spectrum of peptide Mal-LARGDVGA.


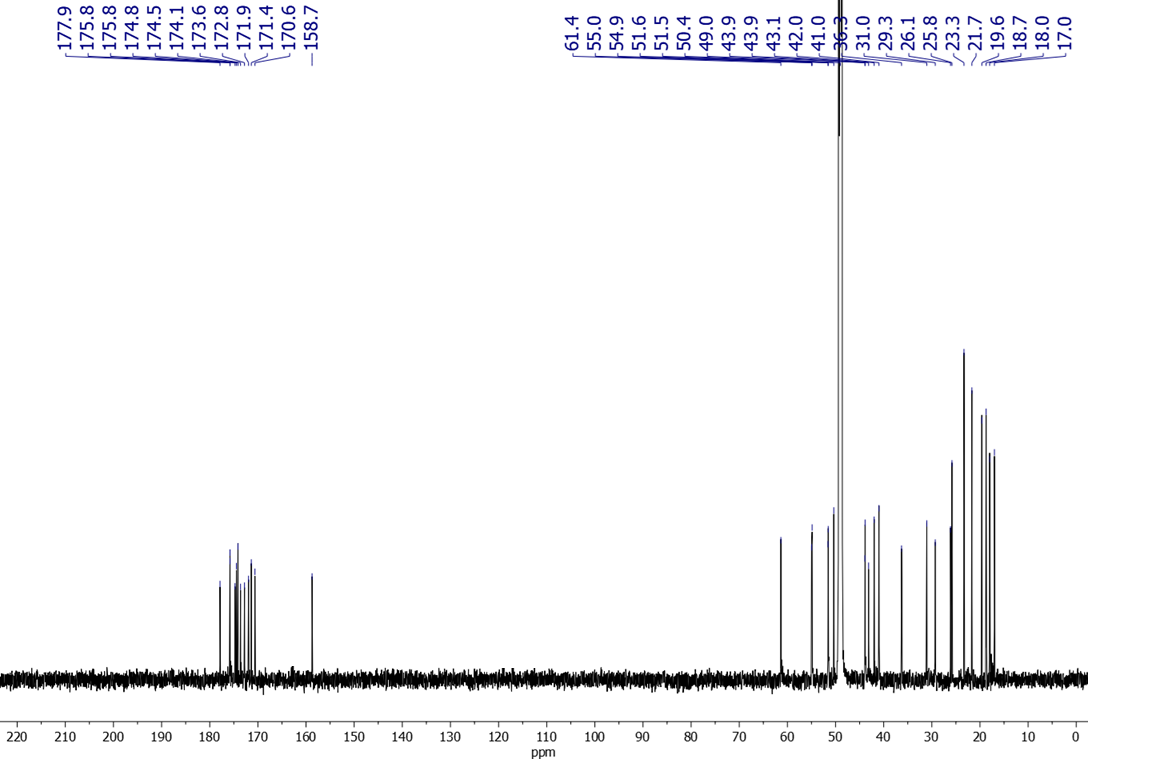


## **Figure S2.** 13C NMR spectrum of peptide **1**.

**Figure S3.** DEPT spectrum of peptide Mal-LARGDVGA.

## **Figure S4.** HSQC spectrum of peptide **1**

## **Figure S5.** HMBC spectrum of peptide **1**

## **Figure S6.** COSY spectrum of peptide **1**.

## **Figure S7.** 15N-1H correlation HMBC spectrum of peptide **1**


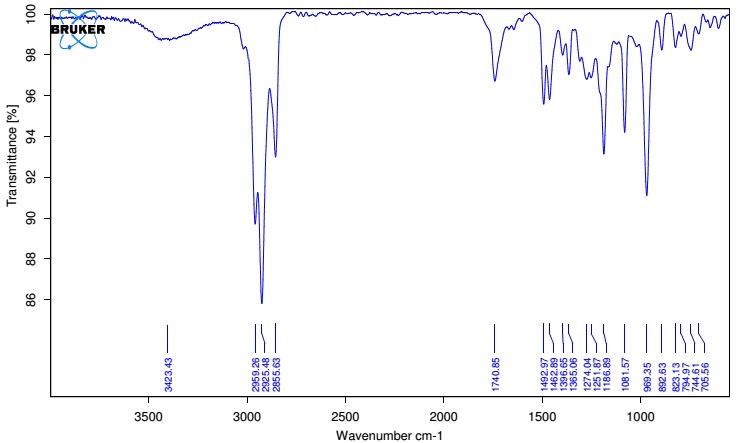


## **Figure S8.** FTIR spectrum of peptide **1**.

# **HPLC chromatogram**


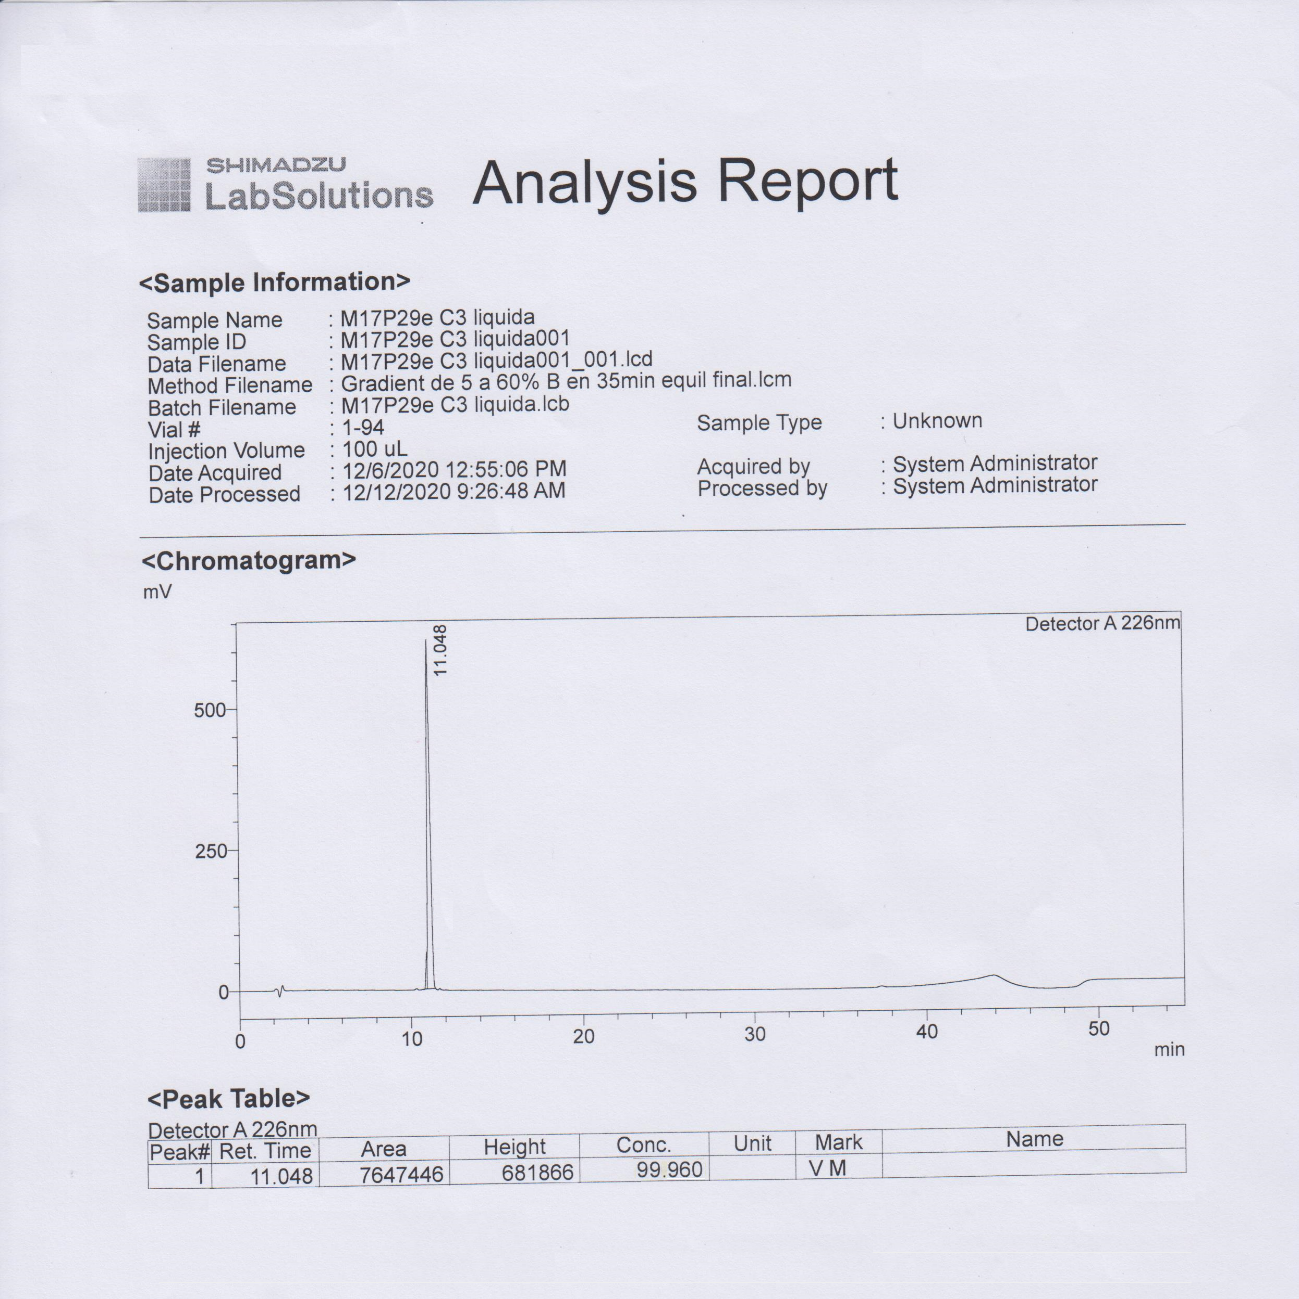


**Figure S9**. RP-HPLC spectrum of peptide **1**, *tR* 11.0 min. (TFA:acetonitrile, 9.5:0.5, flow rate 0.8 mL/min).

# **Mass spectrometry**


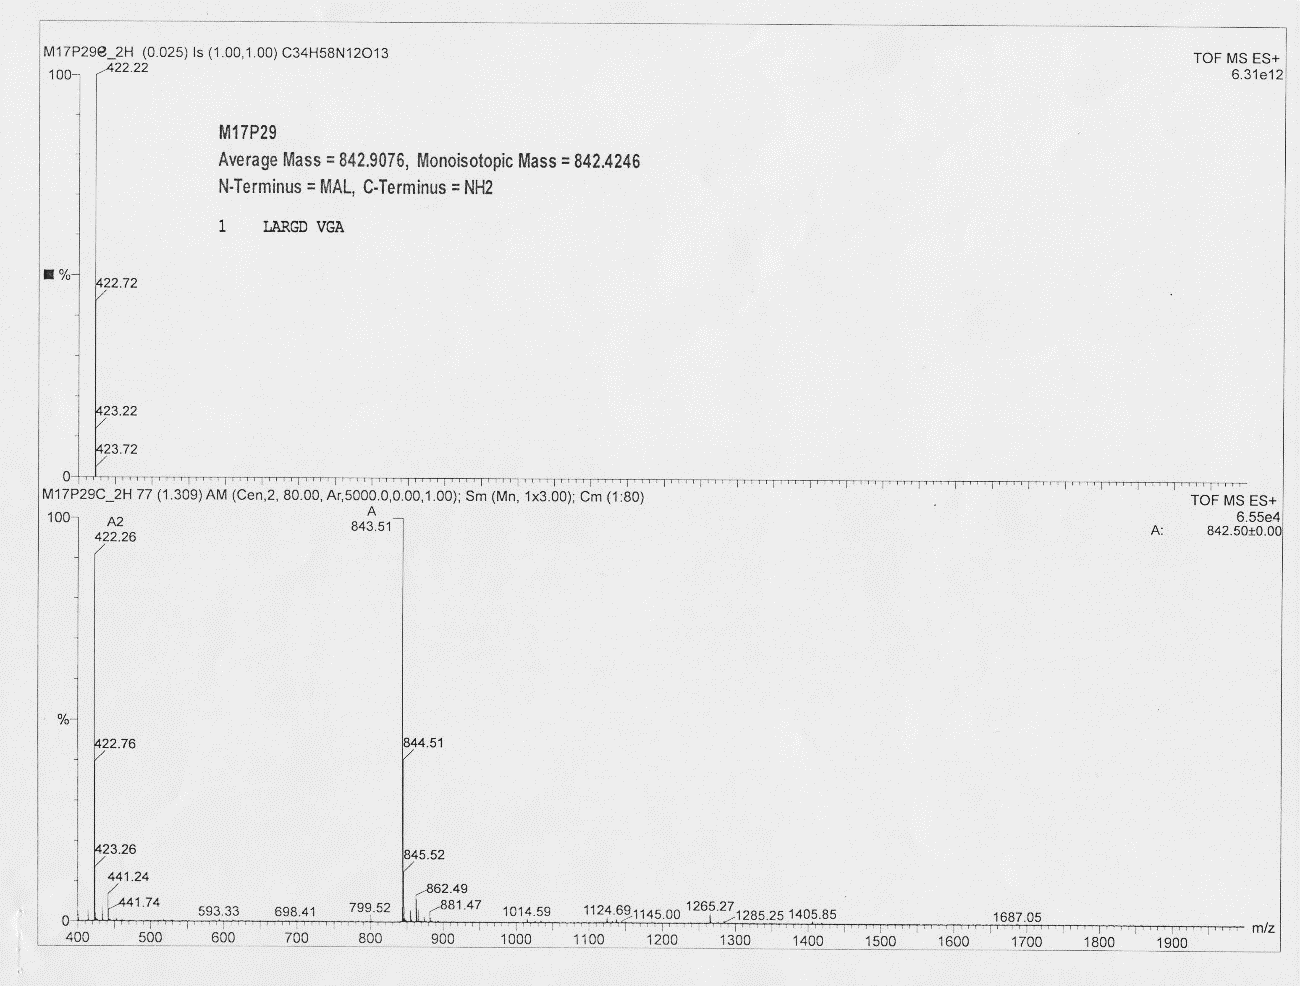


## **Figure S10.** ESI-MS of peptide **1**

# **Thermogravimetric analysis**


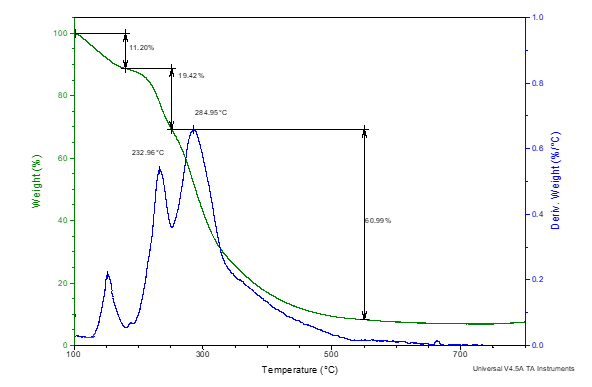


## **Figure S11**. Thermogravimetric analysis of peptide **1**

# **Theoretical calculations**

Table S1. Cartesian atom coordinates of peptide **1**.

| Atom | X | Y | Z |
| --- | --- | --- | --- |
| H | -5.61100 | 7.05200 | -1.65000 |
| O | 9.96100 | -4.78000 | 2.04500 |
| C | -7.61300 | 6.69900 | -0.13000 |
| C | -6.30700 | 5.91200 | -0.03700 |
| C | -6.55500 | 4.46900 | -0.49500 |
| N | -5.29900 | 6.55900 | -0.82700 |
| O | -6.36900 | 4.11400 | -1.63500 |
| C | -7.06200 | 2.22900 | 0.22800 |
| C | -5.64300 | 1.66600 | 0.32500 |
| N | -7.05800 | 3.64600 | 0.46700 |
| O | -4.84700 | 2.15900 | 1.09500 |
| C | -4.19000 | -0.17700 | -0.48500 |
| C | -4.21600 | -1.16100 | 0.68900 |
| N | -5.39000 | 0.62600 | -0.49100 |
| O | -5.03900 | -1.11900 | 1.57700 |
| C | -1.97300 | 0.10200 | -1.70300 |
| C | -2.07800 | 0.78200 | 0.70900 |
| C | -2.86900 | 0.64800 | -0.59200 |
| C | -2.93700 | -2.95800 | 1.74000 |
| C | -1.48200 | -3.40500 | 1.55200 |
| N | -3.25500 | -2.11300 | 0.62100 |
| O | -0.86900 | -3.15900 | 0.52800 |
| O | -4.95500 | -5.76700 | 3.25100 |
| O | -3.31600 | -4.59400 | 4.10500 |
| C | -4.01100 | -4.82900 | 3.15700 |
| C | -3.92500 | -4.13300 | 1.81700 |
| C | 0.45300 | -4.40800 | 2.54700 |
| C | 1.31900 | -3.15600 | 2.69100 |
| N | -0.94200 | -4.09500 | 2.56800 |
| O | 0.89800 | -2.16000 | 3.22500 |
| C | 3.71400 | -2.49400 | 2.49400 |
| C | 4.25200 | -2.90500 | 3.87200 |
| N | 2.56600 | -3.29900 | 2.16400 |
| O | 3.55200 | -3.45700 | 4.68600 |
| C | 2.32600 | 0.89800 | 1.23800 |
| C | 2.90300 | -0.50300 | 1.12000 |
| N | 0.57500 | 2.68100 | -1.40200 |
| N | 0.76800 | 3.27100 | 0.81300 |
| C | 1.07700 | 2.48200 | -0.15400 |
| N | 1.88600 | 1.37500 | -0.05400 |
| C | 3.44900 | -0.98100 | 2.45900 |
| C | 7.60800 | -1.29500 | 4.00200 |
| C | 6.58500 | -2.14200 | 3.24900 |
| C | 7.31700 | -3.27000 | 2.51700 |
| N | 5.55300 | -2.58900 | 4.15300 |
| O | 8.06500 | -2.98600 | 1.58800 |
| C | 7.74700 | -5.72900 | 2.44900 |
| C | 9.27700 | -5.75400 | 2.61700 |
| N | 7.12800 | -4.51200 | 2.97200 |
| O | 9.81400 | -6.65400 | 3.19400 |
| C | 4.82500 | -5.74100 | 1.12200 |
| C | 5.81900 | -8.01800 | 1.49000 |
| C | 5.98000 | -6.67700 | 0.78100 |
| C | 7.36700 | -6.05800 | 0.99700 |
| C | -3.95400 | 6.31700 | -0.81100 |
| C | -3.43800 | 5.45900 | 0.32900 |
| O | -3.21500 | 6.83500 | -1.61300 |
| C | -2.09600 | 4.83400 | 0.01600 |
| O | -1.22500 | 4.99000 | 0.97400 |
| O | -1.91100 | 4.20700 | -1.00500 |
| H | 9.37300 | -4.09300 | 1.66100 |
| H | -7.46200 | 7.72500 | 0.20300 |
| H | -7.98000 | 6.71800 | -1.15700 |
| H | -8.38700 | 6.24700 | 0.48800 |
| H | -5.99200 | 5.91000 | 1.01200 |
| H | -7.52400 | 2.02900 | -0.73900 |
| H | -7.67500 | 1.74200 | 0.98900 |
| H | -6.91900 | 3.92300 | 1.42500 |
| H | -4.25900 | -0.78400 | -1.39400 |
| H | -6.14200 | 0.30700 | -1.07500 |
| H | -1.11600 | 0.76200 | -1.83600 |
| H | -1.57900 | -0.89500 | -1.48100 |
| H | -2.49800 | 0.04900 | -2.65900 |
| H | -1.38900 | 1.62000 | 0.62000 |
| H | -2.71900 | 0.98900 | 1.56200 |
| H | -1.48200 | -0.10700 | 0.92800 |
| H | -3.16500 | 1.65100 | -0.90000 |
| H | -3.00900 | -2.38200 | 2.66900 |
| H | -2.53700 | -2.06100 | -0.08700 |
| H | -5.47100 | -5.83300 | 2.44100 |
| H | -3.70700 | -4.86700 | 1.03400 |
| H | -4.91700 | -3.72800 | 1.59400 |
| H | 0.70500 | -4.96100 | 1.63900 |
| H | 0.67500 | -5.06000 | 3.39500 |
| H | -1.45000 | -4.14900 | 3.43900 |
| H | 4.46200 | -2.71900 | 1.72700 |
| H | 2.78000 | -4.19900 | 1.76700 |
| H | 1.49900 | 0.85700 | 1.95800 |
| H | 3.07700 | 1.58400 | 1.64200 |
| H | 3.69400 | -0.52100 | 0.36400 |
| H | 2.11400 | -1.17600 | 0.77600 |
| H | 1.16600 | 2.51000 | -2.19500 |
| H | -0.13700 | 3.39600 | -1.49600 |
| H | 1.06300 | 2.93900 | 1.72000 |
| H | 1.62600 | 0.64200 | -0.69600 |
| H | 2.76300 | -0.71900 | 3.26200 |
| H | 4.38700 | -0.45900 | 2.67100 |
| H | 7.11900 | -0.43400 | 4.45500 |
| H | 8.09600 | -1.86900 | 4.79200 |
| H | 8.38000 | -0.93700 | 3.32500 |
| H | 6.15300 | -1.51600 | 2.46700 |
| H | 5.81200 | -2.72300 | 5.12100 |
| H | 7.39300 | -6.53000 | 3.09500 |
| H | 6.51100 | -4.62000 | 3.76000 |
| H | 3.88100 | -6.17400 | 0.78600 |
| H | 4.74000 | -5.57200 | 2.19700 |
| H | 4.94200 | -4.77300 | 0.62900 |
| H | 6.63900 | -8.69800 | 1.25400 |
| H | 5.78400 | -7.91000 | 2.57600 |
| H | 4.89100 | -8.50500 | 1.19200 |
| H | 5.92300 | -6.87100 | -0.29500 |
| H | 8.10200 | -6.77900 | 0.62600 |
| H | 7.47600 | -5.17200 | 0.36900 |
| H | -3.37200 | 6.07700 | 1.22800 |
| H | -4.10600 | 4.62800 | 0.57000 |
| H | -0.40400 | 4.39600 | 0.83800 |
